# Supplementary material
Source: PubMed Central journal article supplement (PMC4760146)
Supplement: rstb20150364supp1.pdf [file rstb20150364supp1.pdf]

## Managing Marine Disease Emergencies in an Era of Rapid Change

Maya L. Groner, Jeffrey Maynard, Rachel Breyta, Ryan B. Carnegie, Andy Dobson, Carolyn S. Friedman, Brett Froelich, Melissa Garren, Frances M. D. Gulland, Scott F. Heron, Rachel T. Noble, Crawford W. Revie, Jeffrey D. Shields, Raphaël Vanderstichel, Ernesto Weil, Sandy Wyllie-Echeverria, C. Drew Harvell

Philosophical Transactions of the Royal Society of London B doi: 10.1098/rstb.2015.0364

### Supplemental Material

**Table 1.** Examples of marine disease surveillance programs that have been implemented since 1995. Various types of agencies ranging from non-profit to state to federal to international coordinate these efforts.

| Disease                                 | Host                                              | Pathogen                                                                                | Surveillance Method                                                                               | Agency*                        | Location                               |
|-----------------------------------------|---------------------------------------------------|-----------------------------------------------------------------------------------------|---------------------------------------------------------------------------------------------------|--------------------------------|----------------------------------------|
| Infectious hematopoietic necrosis (IHN) | Various Finfish                                   | IHN virus                                                                               | Cell culture, neutralization tests and DNA [1]                                                    | DFO                            | British Columbia                       |
| Viral hemorrhagic septicemia (VHS)      | Various Finfish                                   | VHS virus                                                                               | Cell culture, neutralization tests and DNA [1]                                                    | DFO                            | British Columbia                       |
| Bacterial Kidney disease (BKD)          | Various Finfish                                   | <i>Renibacterium salmoninarum</i>                                                       | Enzyme-linked immunosorbent assay (ELISA) on kidney tissues [1]                                   | DFO                            | British Columbia                       |
| Furunculosis                            | Various Finfish                                   | <i>Aeromonas salmonicida</i>                                                            | Culture on agar [1]                                                                               | DFO                            | British Columbia                       |
| Microsporidial Gill Disease             | Pacific Salmon                                    | <i>Loma</i> spp.                                                                        | Gill histology [1]                                                                                | DFO                            | British Columbia                       |
| Epitheliocystis                         | Various Finfish                                   | <i>Chlamydia</i> -like bacteria                                                         | Gill histology [1]                                                                                | DFO                            | British Columbia                       |
| Various Bivalve diseases                | Oysters and Mussels                               | Various including <i>Perkinsus marinus</i> , <i>Haplosporidium nelsoni</i> , trematodes | Histological analysis of major tissues [2]                                                        | NOAA, USA Mussel Watch         | USA nationwide                         |
| Perkinsosis, haplosporidiosis, others   | Oysters                                           | <i>Perkinsus marinus</i> , <i>Haplosporidium nelsoni</i> , others                       | Chesapeake Bay, Virginia; annually in autumn; histology, Ray's fluid thioglycollate assay [3,4,5] | Universities                   | Mid-Atlantic                           |
| Vibriosis                               | Humans, concentrated in shellfish                 | <i>V. vulnificus</i> , <i>V. parahaemolyticus</i> , <i>V. cholerae</i>                  | Tracking of human illness and associated contact with shellfish [6]                               | CDC                            | USA Nationwide                         |
| Hematodinium                            | Blue crab, Snow crab, Tanner crab, Norway lobster | <i>Hematodinium perezii</i>                                                             | Cytology, histology, PCR [7,8,9]                                                                  | NOAA, DFO, Universities, CEFAS | Mid-Atlantic, Newfoundland, Alaska, UK |
| Epizootic shell disease                 | American lobster                                  | Bacterial dysbiosis                                                                     | Macroscopic diagnosis [10,11]                                                                     | State agencies and             | Northeast USA                          |

|                                                             |                                            |                                                                             |                                                                                                       |                                         |                                        |
|-------------------------------------------------------------|--------------------------------------------|-----------------------------------------------------------------------------|-------------------------------------------------------------------------------------------------------|-----------------------------------------|----------------------------------------|
|                                                             |                                            |                                                                             |                                                                                                       | universities                            |                                        |
| Gaffkemia                                                   | American lobster                           | <i>Aerococcus viridans homari</i>                                           | Culture, PCR, histology [12]                                                                          | State and provincial agencies           | NE North America                       |
| <i>Panulis argus</i> Virus 1                                | Caribbean spiny lobster                    | PaV1 virus                                                                  | PCR, histology [13]                                                                                   | Universities                            | Caribbean, mostly Florida              |
| White spot                                                  | Shrimp                                     | White spot syndrome virus                                                   | PCR, histology [14]                                                                                   | Various                                 | Pandemic                               |
| Morbillivirus                                               | Cetaceans, Pinnipeds                       | Dolphin morbillivirus, Cetacean morbillivirus, Phocine distemper virus      | Histology, PCR, serology [15]                                                                         | NOAA, Universities                      | USA various coasts                     |
| Leptospirosis                                               | California sea lions                       | <i>Leptospira pomona</i>                                                    | Histology, serology, PCR, Immunohistochemistry (IHC), culture [15]                                    | TMMC, Universities                      | USA various coasts                     |
| Brucellosis                                                 | Marine mammals                             | <i>Brucella marins</i>                                                      | Histology, PCR, IHC, culture [15]                                                                     | NOAA, CDC, USDA, Universities           | USA various coasts                     |
| Q fever                                                     | Marine Mammals                             | <i>Coxiella burnetti</i>                                                    | Histology, PCR [15]                                                                                   | NOAA, CDC, Universities                 | USA various coasts                     |
| Protozoal encephalitis and myositis                         | Marine mammals                             | Protozoa                                                                    | Histology, serology, IHC, PCR, culture [15]                                                           | NOAA, NIH, Universities, State Agencies | USA                                    |
| Black sea urchin <i>Diadema antillarum</i> die off          | Black sea urchin <i>Diadema antillarum</i> | Unidentified specific pathogen                                              | Disease signs in field monitoring programs [16, 17, 19]                                               | STRI, UPR NOAA, UMI, USGS other DMRPs   | Wider Caribbean                        |
| Black band disease (BBD)                                    | > 40 coral spp and some octocorals         | Bacterial consortia, (cyanobacteria, sulf-oxydizing & sulfo-reducing, etc.) | Disease signs in field monitoring programs, lab cultures, histology, DNA [18, 19, 20, 21, 22]         | FIU, UPR, BBSR, USGS, other DMRPs       | Wider Caribbean, Indo-Pacific, Red Sea |
| White band disease (WBD)                                    | Acroporid corals in the Caribbean          | <i>Vibrio charchariae</i>                                                   | Disease signs in field monitoring programs, lab. cultures, DNA [19, 21, 22, 23, 24, 25]               | UPR, USGS UNAM, UMI, other DMRPs        | Wider Caribbean                        |
| White patches-patchy necrosis-white pox- shut down reaction | Acroporids                                 | <i>Serratia marcesens</i> and maybe other bacteria                          | Disease signs in field monitoring programs, lab cultures, histology, DNA analyses [21, 25, 26]        | UG, UPR, UNAM, USGS, other DMRPs        | Wider Caribbean                        |
| Caribbean yellow band disease (CYBD)                        | 12 corals species                          | <i>Vibrio</i> species complex                                               | Disease signs in field monitoring programs, lab cultures, histology, DNA [19, 21, 28, 29, 30, 31, 32] | UPR, BBSR UNAM, STRI, other DMRPs       | Wider Caribbean                        |

|                                                        |                                          |                                                                           |                                                                                                     |                                        |                                            |
|--------------------------------------------------------|------------------------------------------|---------------------------------------------------------------------------|-----------------------------------------------------------------------------------------------------|----------------------------------------|--------------------------------------------|
| White plague disease types (WPD)                       | 40 corals species and two hydrocorals?   | <i>Aurantimonas coralicida</i> and other bacteria                         | Disease signs in field monitoring programs, lab/field experimentation, DNA [19, 21, 22, 33, 34, 35] | UPR, MML, BBSR, UMI, USGS, other DMRPs | Wider Caribbean, Atlantic and Indo-Pacific |
| Dark spots disease (DSD)                               | 11 coral species                         | Unknown, but some indication of a fungal problem                          | Disease signs in field monitoring programs, lab. cultures, histology DNA [19, 21, 28]               | UNAM, UPR, INVEMAR, other DMRPs        | Wider Caribbean and Pacific reefs          |
| Aspergillosis (ASP)                                    | Sea fans and other octocorals            | <i>Aspergillus sidowii</i>                                                | Disease signs in field monitoring programs, Lab cultures, histology, DNA [19, 21, 36, 37, 38, 39]   | Cornell U, UPR, other DMRP's           | Wider Caribbean                            |
| Red band disease (RBD)                                 | Sea fan Octocorals and 13 coral species  | Cyanobacteria - <i>Oscillatoria</i> sp. and other spp.                    | Disease signs in field monitoring programs, lab cultures, histology [19, 34]                        | UPR and other DMRPs                    | Wider Caribbean                            |
| Multi focal purple spots (MFPS)                        | Sea Fan <i>Gorgonia ventalina</i>        | Protozoan – <i>Labyrinthula</i> sp.?                                      | Disease signs in field monitoring programs, histology, lab cultures, DNA [19, 40]                   | Cornell U, UPR                         | Wider Caribbean,                           |
| Caribbean ciliate infection (CCI)                      | 22 species of corals                     | <i>Halofolliculina</i> sp.                                                | Disease signs in field monitoring programs, histology, lab cultures,, DNA [19, 41, 42]              | UPR, USB and other DMRPs               | Wider Caribbean                            |
| Crustose coralline white band syndrome (CWBS)          | > Three species of coralline algae (CCA) | Unknown                                                                   | Disease signs in field monitoring programs [19, 43, 44, 45]                                         | UPR, USB, NOAA, other DMRP's           | Wider Caribbean and Indo-Pacific           |
| Bacterial Bleaching (BBLE)                             | >Three coral species                     | <i>Vibrio shiloi</i> , <i>V. coralliilyticus</i>                          | Bleaching signs, lab. cultures, DNA. {21, 46, 47]                                                   | UTA, other DMRPs                       | Mediterranean, Red Sea and Indian Ocean    |
| Skeletal eroding band (SEB)                            | 31 species of corals                     | Ciliate <i>Halofolliculina corallasia</i>                                 | Disease signs in field monitoring programs, lab. observations, DNA. [20, 21, 48, 49]                | AIMS. USH, UH, UGU, other DMRPs        | Indo-Pacific and Red Sea                   |
| White syndrome (WS)                                    | > 17 coral species                       | Proteobacteria, family Vibrionaceae                                       | Disease signs in field monitoring programs, cultures, DNA [20, 21, 50, 51]                          | AIMS. USH, UGU, UH, other DMRPs        | Indo-Pacific Red sea                       |
| Brown band (BrB)                                       | Many coral species and some octocorals   | Mobile ciliates, <i>Helicostoma nonatum</i> - <i>Porpostoma guamensis</i> | Disease signs in field monitoring programs, lab. cultures, DNA [20, 21, 51, 52]                     | AIMS. USH, UGU, UH, other DMRPs        | Indo-Pacific                               |
| Yellow band disease (YBD) – (Indian Ocean and Red Sea) | 12 coral spp.                            | <i>Vibrio</i> species-complex                                             | Disease signs in field monitoring programs, lab. cultures, histology [21, 30, 52]                   | AIMS. USH, UH, other DMRPs             | Arabian Gulf, Indo-Pacific                 |

|                                                                     |                                                      |                                                                                              |                                                                                                 |                                                  |                                            |
|---------------------------------------------------------------------|------------------------------------------------------|----------------------------------------------------------------------------------------------|-------------------------------------------------------------------------------------------------|--------------------------------------------------|--------------------------------------------|
| <i>Porites</i> ulcerative white spots (PUWS)                        | Massive and branching <i>Porites</i> spp., other spp | Unknown                                                                                      | Disease signs in field monitoring programs [20, 51, 53, 54]                                     | AIMS, USH, UH, UGU, other DMRPs                  | Indo-Pacific                               |
| Trematodiasis (TRE)                                                 | Mostly massive <i>Porites</i> spp.                   | Trematode ( <i>Podocotyloides stenometra</i> )                                               | Disease signs in field monitoring programs, lab. cultures, DNA [20, 55, 56]                     | AIMS, USH, UH, UGU, other DMRPs                  | Indo-Pacific                               |
| Pink line, pink response                                            | Massive <i>Porites</i> spp and other coral spp       | Cyanobacteria ( <i>Phormidium valderianum</i> ), fungi and other “irritants”                 | Disease signs in field monitoring programs, lab. cultures histology [20, 50, 57]                | AIMS, USH, UH, UGU, other DMRPs                  | Indo-Pacific                               |
| Growth anomalies (GAN) – Skeletal anomalies (SKA) – tumors          |                                                      | Endolithic fungi, algae ( <i>Ento cladia endozoica</i> ), trematode ( <i>P. stenometra</i> ) | Disease signs in field monitoring programs, lab. cultures, DNA [19, 20, 21, 59, 60, 61, 62, 63] | UPR, USGS, AIMS, USH, UH, UGU, NOAA, other DMRPs | Caribbean, Atlantic, Indo-Pacific, Red Sea |
| Black necrosing syndrome (BNS) and Fungal protozoan syndrome (FPS)  | 16 CA and 24 IP coral spp, many octocorals           | Bacteria, ciliates, several fungal species                                                   | Disease signs in field monitoring, epizootic events, lab. cultures, DNA [20, 21, 64]            | AIMS, USH, UH, UGU, NOAA, other DMRPs            | Indo-Pacific, Red Sea, Mediterranean sea   |
| Coralline lethal orange disease (CLOD)                              | Several species of octocorals                        | Bacterial consortium ( <i>Planococcus</i> , <i>Bacillus</i> , and <i>Pseudomonas</i> )       | Disease signs in field monitoring, lab cultures. DNA (19, 44, 65, 66, 67, 68, 69]               | AIMS, USH, UH, UGU, NOAA, other DMRPs            | Indo-Pacific, Caribbean                    |
| Coralline fungal disease (CFD)                                      | Various CCA species                                  | Fungus                                                                                       | Disease signs in field monitoring, lab. cultures [44, 70]                                       | AIMS, USH, UH, UGU, NOAA, other DMRPs            | Indo Pacific                               |
| <i>Gorgonia</i> wasting syndrome (GWS)                              | Sea fan <i>Gorgonia ventalina</i>                    | Bacteria?                                                                                    | Disease signs in field monitoring programs [71]                                                 | UPR                                              | Puerto Rico                                |
| Other coral, octocoral, zoanthid and sponge health conditions (OHC) | Many species of these major coral reef groups        | Unknown pathogens                                                                            | Disease signs in field monitoring programs [19, 20, 21, 43, 62]                                 | UPR, BBSR, INVEMAR, AIMS, other DMRPs            | Caribbean, Indo-Pacific                    |

\* DFO-Department of Fisheries and Oceans, Canada, CDC- Center for Disease Control, USA, NIH-National Institute for Health, USA, NOAA- National Oceanic and Atmospheric Administration, USA, USDA, United States Department of Agriculture, TMMC- The Marine Mammal Center, CEFAS- Center for Environment, Fisheries and Aquaculture Science; UPR – University of Puerto Rico; BBSR- Bermuda Biological Research Station; FIU – Florida International University; STRI- Smithsonian Tropical Research Institute; UMI – University of Miami; INVEMAR- Instituto de Investigaciones Marinas, Colombia; UNAM – Universidad Autonoma de Mexico, USGS – United States Geological Survey; USB – Universidad Simon Bolivar; MML – Mote Marine Lab; UTA- University of Tel Avid; AIMS-LTMP- Australian Institute of Marine Science Long Term Monitoring Program; USH – University of Shizuoka (Japan); UH – University of Hawaii; UGU- University of Guan; DMRP’s – Coral reef Disease Monitoring Research Programs (i.e. CARICOMP, AGGRA, ALMC, etc).

### Literature Cited

1. Kent ML, Traxler GS, Kieser D, *et al.* 1998. Survey of salmonid pathogens in ocean-caught fishes in British Columbia, Canada. *J Aquat Anim Health*, **10**, 211-219. (doi: 10.1577/1548-8667(1998)010<0211:SOSP>2.0.CO;2)
2. Kim Y, Powell EN. 2007 Distribution of parasites and pathologies in sentinel bivalves: NOAA status and trends “Mussel Watch” program. *J Shell Res* **26**, 1115-1151. (doi: [http://dx.doi.org/10.2983/0730-8000\(2007\)26\[1115:DOPAPI\]2.0.CO;2](http://dx.doi.org/10.2983/0730-8000(2007)26[1115:DOPAPI]2.0.CO;2))
3. Tarnowski M. 2015 Maryland oyster population status report—2014 fall survey. Maryland Department of Natural Resources, Annapolis. 68 pp.
4. Ford SE, Bushek D. 2012 Development of resistance to an introduced marine pathogen by a native host. *J Mar Res* **70**, 205-223. (doi: <http://dx.doi.org/10.1357/002224012802851922>)
5. Carnegie RB, Bureson EM. 2011 Declining impact of an introduced pathogen: *Haplosporidium nelsoni* in the oyster *Crassostrea virginica* in Chesapeake Bay. *MEPS*, **432**, 1-15. (doi: 10.3354/meps09221)
6. Centers for Disease Control and Prevention (CDC). 2012. Cholera and Other Vibrio Illness Surveillance Overview. Atlanta, Georgia: US Department of Health and Human Services, CDC.
7. Shields JD, Taylor DM, O Keefe PG, Colbourne E, Hynick E. 2007. Epidemiological determinants in outbreaks of bitter crab disease (*Hematodinium* sp.) in snow crabs *Chionoecetes opilio* from Conception Bay, Newfoundland, Canada. *Dis Aquat Org*, **77**, 61-72. (doi: 10.3354/dao01825)
8. Shields JD, Sullivan SE, Small HJ. 2015. Overwintering of the parasitic dinoflagellate *Hematodinium perezii* in dredged blue crabs (*Callinectes sapidus*) from Wachapreague Creek, Virginia. *J Invert Pathol*, **130**, 124-132. (doi: 10.1016/j.jip.2015.07.013)
9. Stentiford GD, Neil DM, Coombs GH. 2001. Development and application of an immunoassay diagnostic technique for studying *Hematodinium* infections in *Nephrops norvegicus* populations. *Dis Aquat Org*, **46**, 223-229. (doi: 10.3354/dao046223)
10. Glenn RP, Pugh TL. 2006. Epizootic shell disease in American lobster (*Homarus americanus*) in Massachusetts coastal waters: interactions of temperature, maturity, and intermolt duration. *J Crust Biol*, **26**, 639-645. (doi: 10.1651/S-2754.1)
11. Shields JD. 2013 Complex etiologies of emerging diseases in lobsters (*Homarus americanus*) from Long Island Sound. *Can J Fish Aquat Sci* **70**, 1576-1587. (doi: [org/10.1139/Cjfas-2013-0050](http://dx.doi.org/10.1139/Cjfas-2013-0050))
12. Stebbing PD, Pond MJ, Peeler E, *et al.* (2012) Limited prevalence of gaffkaemia (*Aerococcus viridans* var. *homari*) isolated from wild-caught European lobsters *Homarus gammarus* in England and Wales. *Dis Aquat Org*, **100**, 159-167. (doi: 10.3354/dao02491)
13. Moss J, Behringer D, Shields JD, *et al.* 2013. Distribution, prevalence, and genetic analysis of *Panulirus argus* virus 1 (PaV1) from the Caribbean Sea. *Dis Aquat Org*, **104**, 129-140. (doi: 10.3354/dao02589)
14. Sánchez-Paz A. 2010. White spot syndrome virus: an overview on an emergent concern. *Vet res*, **41**, 43. (doi: 10.1051/vetres/2010015)
15. Simeone CA, Gulland FMD, Norris T, Rowles TK. 2015. A Systematic Review of Changes in Marine Mammal Health in North America, 1972-2012: The Need for a Novel Integrated Approach. *PLoS One* **10**, e0142105. (doi:10.1371/journal.pone.0142105)
16. Lessios HA. 2016. The Great *Diadema antillarum* Die-Off: 30 Years Later *Annu. Rev. Mar. Sci.* **2016**, **8**, 1–17 (doi: 10.1146/annurev-marine-122414-033857).
17. Weil E, Torres JL, Ashton M. 2005. Population characteristics of the sea urchin *Diadema antillarum* in La Parguera, Puerto Rico, 17 years after the mass mortality event. *Rev Biol Trop*, **53**, 219-231
18. Richardson, L. 2004. Black band disease In E. Rosemberg and Y. Loya (Eds.) Coral reef health and diseases Pp.325-335. Springer, New York.
19. Weil E, Rogers CS. 2011. Coral Reef disease in the Atlantic-Caribbean. In Z. Dubinski and N. Stambler Eds. Coral Reefs: An Ecosystem in Transition Chapter 27. Pp. 465-492. Springer. New York.
20. Willis B, Page C, Dinsdale EA 2004. Coral disease on the Great Barrier Reef. In E. Rosemberg and Y. Loya (Eds.) Coral reef health and diseases Pp.69-104. Springer, New York.
21. Sutherland KP, Porter JW, Torres C, 2004. Disease and immunity in Caribbean and Indo-Pacific zooxanthellate corals. *Mar Ecol Prog Ser*, **266**, 273–302. (doi: 10.3354/meps266273)
22. Loya Y. 2004. The coral reefs of Eilat. Past, present and future. Three decades of coral community structure studies. In E. Rosemberg and Y. Loya (Eds.) Coral reef health and diseases Pp.1-29. Springer, New York.
23. Ritchie KB, Smith GW. 1998. Description of type II white band disease in acroporid corals. *Rev Biol Trop*, **46**, 199–203.
24. Bythel J, Pantos O, Richardson L. 2004. White plague, white band and other “white” diseases. In: Rosenberg E, Loya Y (eds) Coral health and disease. Springer, NY, pp 351-364.
25. Gil-Agudelo DL, Smith GW, Weil E. 2006. The white band disease type II pathogen in Puerto Rico. *Rev Biol Trop*, **54**(supl 3), 59-67.
26. Paterson K, Ritchie K. 2004. White Pox Disease of the Caribbean Elkhorn coral *Acropora palmata*. In Rosemberg E and Loya Y (Eds) Coral Health and Disease. Pp. 284 -297. Springer, NY

27. Rodriguez-Martinez RE, Benaszak AT, Jordan-Dahlgren E. 2001. Necrotic patches affect *Acropora palmata* (Scleractinia: Acroporidae) in the Mexican Caribbean. *Dis Aquat Org*, **47**, 229–234. (doi: 10.3354/dao047229)
28. Gil-Agudelo D, Smith GW, Garzon-Ferreira J, Weil E, Peterson D. 2004. Dark spots disease and yellow band disease, two poorly known coral diseases with high incidence in Caribbean reefs. In: Rosenberg E, Loya Y (eds) Coral health and disease. Springer, NY, pp 337–350.
29. Harvell CD, Markel S, Jordan-Dahlgren E, et al. 2007. Coral disease, environmental drivers and the balance between coral and microbial associates. *Oceanography*, **20**, 36–59. (doi: http://dx.doi.org/10.5670/oceanog.2007.91)
30. Cervino JM, Thompson FL, Gomez-Gil B, et al. 2008. *Vibrio* pathogens induce yellow band disease in Caribbean and Indo-Pacific reef-building corals. *J Appl Microbiol*, **105**, 1658–1671. (doi:10.1111/J.1365-2672.2008.03871x)
31. Bruckner AW, Hill R. 2009. Ten years of change to coral communities off Mona and Desecheo islands, Puerto Rico, from disease and bleaching. *Dis Aquat Org*, **87**, 19–31. (doi: 10.3354/dao02120)
32. Weil E, Croquer A, Urreiztieta I. 2009. Temporal variability and consequences of coral diseases and bleaching in La Parguera, Puerto Rico from 2003–2007. *Carib J Sci*, **45**, 221–246.
33. Denner EBM, Smith GW, Busse HJ, Schumann et al. 2003. *Aurantimonas corallicida* gen. nov., sp. nov., the causative agent of white plague type II on Caribbean scleractinian corals. *Int J Syst Evol Microbiol*, **53**, 1115–1122. (doi: 10.1099/ijs.0.02359-0)
34. Richardson LL. 1998. Coral diseases: what is really known? *Trends Ecol Evol*, **13**, 438–443. (doi: 10.1016/S0169-5347(98)01460-8)
35. Rogers CS, Miller J, Muller EM (2008a) Coral diseases following massive bleaching in 2005 cause 60 percent decline in coral cover and mortality of the threatened species, *Acropora palmata*, on reefs in the U.S. Virgin Islands. USGS Fact Sheet 2008–3058.
36. Nagelkerken I, Buchan K, Smith GW, et al. 2007. Widespread disease in Caribbean sea fans: I. Spreading and general characteristics. In: Proceedings of 8th international coral reef symposium, vol 1, Panama, 1997, pp 679–682
37. Smith GW, Weil E. 2004. Aspergillosis of gorgonians. In: Rosenberg E, Loya Y (eds) Coral health and disease. Springer, NY, pp 279–286.
38. Kim K, Harvell CD. 2002. Aspergillosis of sea fan corals: disease dynamics in the Florida Keys. In: Porter J, Porter K (eds) The Everglades, Florida Bay, and coral reefs of the Florida Keys, an ecosystem sourcebook. CRC Press, Boca Raton, pp 813–824.
39. Flynn K, Weil E. 2009. Variability of Aspergillosis in *Gorgonia ventalina* in La Parguera, Puerto Rico. *Carib. J Sci*, **45**, 215–220.
40. Burge CA, Douglas N, Conti-Jerpe I, et al. 2012. Friend or foe: the association of Labyrinthomycetes with the Caribbean sea fan, *Gorgonia ventalina*. *Dis Aquat Org* **101**, 1–12. (doi: 10.3354/dao02487)
41. Croquer A, Bastidas C, Lipscomb D. 2006. Folliculinid ciliates: a new threat to Caribbean corals? *Dis Aquat Org*, **69**, 75–78. (doi: 10.3354/dao069075)
42. Croquer A, Weil E. 2009. Spatial variability in distribution and prevalence of coral and octocoral diseases in the Caribbean II: genera-level analysis. *Dis Aquat Org*, **83**, 209–222. (doi: 10.3354/dao02012)
43. Weil E. 2004. Coral Reef Diseases in the Wider Caribbean. In E. Rosenberg and Y. Loya (Eds.) Coral reef health and diseases. Pp. 35–68. Springer-Verlag,
44. Ballantine D, Weil E, Ruiz H. 2005. Coralline white band syndrome: a coralline algal affliction in the tropical Atlantic. *Coral Reefs*, **24**, 117. (doi: 10.1007/s00338-004-0424-8)
45. Vargas BA. 2010. Crustose coralline algal diseases in the U.S.-Affiliated Pacific Islands. *Coral Reefs*, **29**, 943–956. (doi:10.1007/s00338-010-0646-x.)
46. Rosenberg E and Falkovitz L. 2004. The *vibrio shiloi/oculina patagonica* model system of coral bleaching. *Annu. Rev. Microbiol* 2004, **58**, 143–59. (doi: 10.1146/annurev.micro.58.030603.123610)
47. Ben-Haim Y and Rosember E. 2004. Temperature regulated bleaching and tissue lysis of *Pocillopora damicornis* by the novel pathogen *Vibrio coralliilycus*. In E. Rosemberg and Y. Loya (Eds.) Coral reef health and diseases. Pp. 301–321. Springer-Verlag,
48. Antonius A, Lipscomb D. 2001. First protozoan coral-killer identified in the Indo-Pacific. *Atoll Res Bull*, **481**, 1–21. (doi: 10.5479/si.00775630.481)
49. Winkler R, Antonius A, Renegar DA, 2004. The Skeleton Eroding Band Disease on Coral Reefs of Aqaba, Red Sea. *Mar Ecol*, **25**, 129–144. (doi: 10.1111/j.1439-0485.2004.00020.x)
50. Sussman M, Willis B, Victor S, Bourne DG 2008. Coral Pathogens Identified for White Syndrome (WS) Epizootics in the Indo-Pacific. *PLoS one*, **3**, e2393. (doi:10.1371/journal.pone.0002393)
51. Weil E, Casareto B, Irikawa A, Suzuki Y. 2012. Extended geographic distribution of several Indo-Pacific coral reef diseases. *Dis Aquat Org*, **98**, 163–170. (doi: 10.3354/dao02433)
52. Korrubel JL, Riegl B. 1998. A new coral disease from the Arabian Gulf. *Coral Reefs*, **17**, 22. (doi: 10.1007/s003380050088)
53. Raymundo LJH, Harvell CD, Reynolds TL. 2003. *Porites* ulcerative white spot disease, description, prevalence and host range of a new coral disease affecting Indo-Pacific reefs. *Dis Aquat Org*, **56**, 95–104. (doi: 10.3354/dao056095)

54. Raymundo LJH, Rosell KB, Reboton CT, Kaczmarek L, 2005. Coral diseases on Philippine reefs: genus *Porites* is a dominant host. *Dis Aquat Org*, **64**, 181–191. (doi:10.3354/dao064181)
55. Aeby, GS, 1998. A digenean metacercaria from the reef coral, *Porites compressa*, experimentally identified as *Podocotyloides stenometra*. *J Parasitol*, **84**, 1259–1261.
56. Aeby, GS. 2003. Corals in the genus *Porites* are susceptible to infection by a larval trematode. *Coral Reefs*, **22**, 216. (doi: 10.1007/s00338-003-0310-9)
57. Ravindran J, Raghukumar C. 2002. Pink line syndrome (PLS) in the scleractinian coral *Porites lutea*. *Coral Reefs*, **21**, 252. (doi: 10.1007/s00338-002-0247-4)
58. Yamashiro H. 2004. Coral diseases. In: Coral reefs of Japan. Ministry of Environment and the Japanese Coral Reef Society, Tokyo, p 56–59.
59. Squires DF. 1965. Neoplasia in a coral? *Science*, **148**, 503–505.
60. Peters EC, Halas JC, McCarty HB 1986. *Calicoblastic neoplasms* in *Acropora palmata* with a review of reports on anomalies of growth and form in corals. *J Natl Cancer Inst*, **76**, 895–912.
61. Peters EC. 1997. Diseases of coral reef organisms. In: Birkeland C (ed) Life and death of coral reefs. Chapman & Hall, New York, p 114–139.
62. Raymundo LJ, Couch CS, Harvell DC (eds) 2008. Coral disease handbook. Guidelines for assessment, monitoring and managing. GEF-CRTR Program, Currie Commission, Melbourne. 120 pp.
63. Irikawa A, Casareto BE, Suzuki Y, Hidaka M, van Woesik R. 2011. Growth anomalies on *Acropora cytherea* corals. *Mar Pollut Bull*, **62**, 1702–1707. (doi:10.1016/j.marpolbul.2011.05.033)
64. Cerrano C, Bavestrello G, Bianchi CN, *et al.* 2000. A catastrophic mass-mortality episode of gorgonians and other organisms in the Ligurian Sea (Northwestern Mediterranean) summer 1999. *Ecol Lett*, **3**, 284–293. (doi: 10.1046/j.1461-0248.2000.00152.x)
65. Littler MM, Littler DS. 1994. A pathogen of reef-building coralline algae discovered in the South Pacific. *Coral Reefs*, **13**, 202. (doi: 10.1007/BF00303632)
66. Littler MM, Littler DS. 1995. Impact of CLOD pathogen on Pacific coral reefs. *Science*, **267**, 1356–1360.
67. Littler MM, Littler DS. 1997. Disease-induced mass mortality of crustose coralline algae on coral reefs provide a rationale for the conservation of herbivorous fish stocks. In: Proc. 8th Int. Coral Reef Symp, **1**, 719–724.
68. Aeby GS (2007) First record of coralline lethal orange disease (CLOD) in the Northwestern Hawaiian Islands. *Coral Reefs*, **26**, 385.
69. Cervino JM, Littler MM, Littler DS, *et al.* 2005. Identification of microbes associated with coralline lethal algal disease and its relationship to glacial ice melt (global warming). *Phytopathology*, **95**, 120–121.
70. Littler MM, Littler DS. 1998. An undescribed fungal pathogen of reef-forming crustose coralline algae discovered in American Samoa. *Coral Reefs*, **17**, 144.
71. Weil E, Croquer A, Flynn K, *et al.* 2014. Spatial and temporal dynamics of diseases affecting the sea-fan *Gorgonia ventalina* in La Parguera, southwest coast of Puerto Rico. 3<sup>rd</sup>. Asian-Pacific Coral Reef Symposium, abstract book, p. 211.
